# Supplementary material for: Potent Anticancer Effect of the Natural Steroidal Saponin Gracillin Is Produced by Inhibiting Glycolysis and Oxidative Phosphorylation-Mediated Bioenergetics
Source: PubMed Central journal article supplement (PMC7226187; doi:10.3390/cancers12040913), 2020-04-08
Supplement: cancers-12-00913-s001.pdf [file cancers-12-00913-s001.pdf]

Supplementary Materials

# Potent Anticancer Effect of the Natural Steroidal Saponin Gracillin Is Produced by Inhibiting Glycolysis and Oxidative Phosphorylation-Mediated Bioenergetics

Hye-Young Min, Honglan Pei, Seung Yeob Hyun, Hye-Jin Boo, Hyun-Ji Jang, Jaebeom Cho, Ji Hye Kim, Jaekyoung Son and Ho-Young Lee

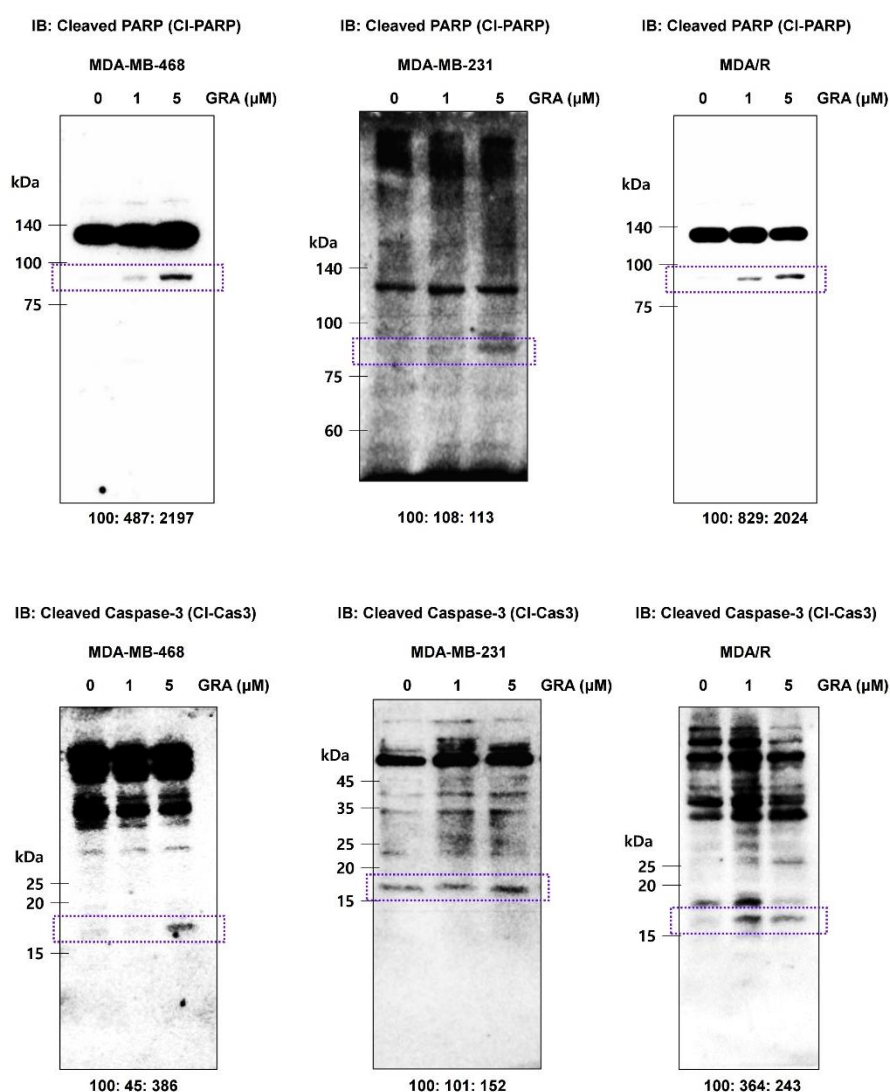

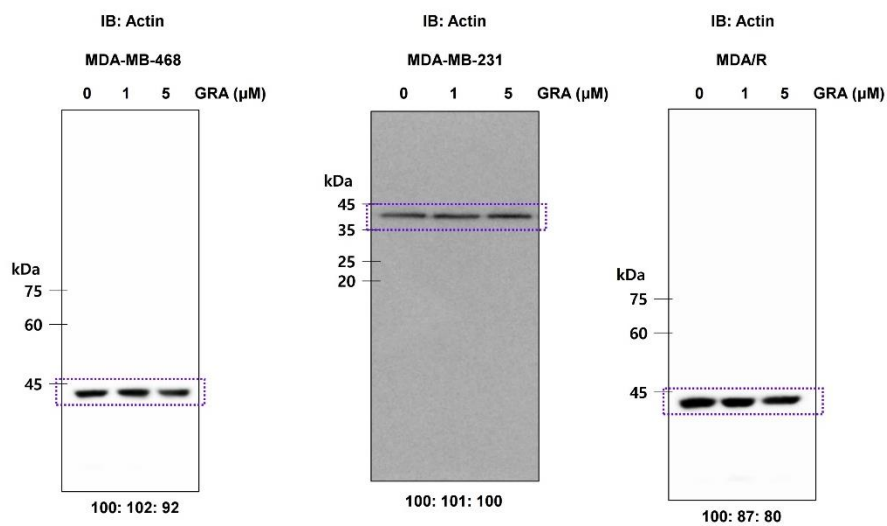

Figure S1. Uncropped blots with molecular weight markers and densitometry of each band.

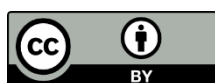

© 2020 by the authors. Licensee MDPI, Basel, Switzerland. This article is an open access article distributed under the terms and conditions of the Creative Commons Attribution (CC BY) license (<http://creativecommons.org/licenses/by/4.0/>).
